# Supplementary material for: Excitation energies, singlet–triplet energy gaps, spin–orbit matrix elements and heavy atom effects in BOIMPYs as possible photosensitizers for photodynamic therapy: a computational investigation
Source: Royal Society of Chemistry journal article supplement (doi:10.1039/c7cp06763a), 2017-12-20

## Supplementary Information

### **Excitation energies, singlet-triplet energy gap, spin-orbit matrix elements and heavy atom effect in BOIMPYs as possible photosensitizers in photodynamic therapy. A computational investigation**

Bruna Clara De Simone,\* Gloria Mazzone,\* Nino Russo, Emilia Sicilia, Marirosa Toscano

Dipartimento di Chimica e Tecnologie Chimiche, Università della Calabria, Rende (CS), Italy

#### **Table of Contents**

|                                                                                                                                                         |   |
|---------------------------------------------------------------------------------------------------------------------------------------------------------|---|
| <b>Table S1:</b> SOCs computed for compounds <b>1</b> and <b>4</b> by using B3LYP functional in conjunction with different basis sets.....              | 2 |
| <b>Figure S1:</b> Molecular orbitals composition for the excited states involved in the singlet and triplet excitation for <b>1-5, 7</b> compounds..... | 3 |

**-Table S1-**

Average squared values ( $\text{cm}^{-1}$ ) of Spin-orbit Cartesian components between low-lying singlet and triplet states calculated employing B3LYP in conjunction with different basis sets on **1** and **4** optimized structures at B3LYP/6-31G\* level of theory.

| Cmpd     | Basis set | $\langle \Psi_{S_1}   \hat{H}_{so}   \Psi_{T_1} \rangle$ | $\langle \Psi_{S_1}   \hat{H}_{so}   \Psi_{T_2} \rangle$ | $\langle \Psi_{S_1}   \hat{H}_{so}   \Psi_{T_3} \rangle$ | $\Delta E_{S_1 \rightarrow T_1}$ | $\Delta E_{S_1 \rightarrow T_2}$ | $\Delta E_{S_1 \rightarrow T_3}$ |
|----------|-----------|----------------------------------------------------------|----------------------------------------------------------|----------------------------------------------------------|----------------------------------|----------------------------------|----------------------------------|
| <b>1</b> | cc-pVDZ   | 0.01                                                     | 0.28                                                     |                                                          | 1.40                             | 0.36                             |                                  |
|          | cc-pVTZ   | 0.01                                                     | 0.32                                                     |                                                          | 1.39                             | 0.35                             |                                  |
| <b>4</b> | cc-pVDZ   | 5.31                                                     | 44.56                                                    | 31.26                                                    | 1.30                             | 0.31                             | 0.20                             |
|          | cc-pVTZ   | 5.41                                                     | 41.43                                                    | 31.68                                                    | 1.28                             | 0.30                             | 0.17                             |

-Figure S1-

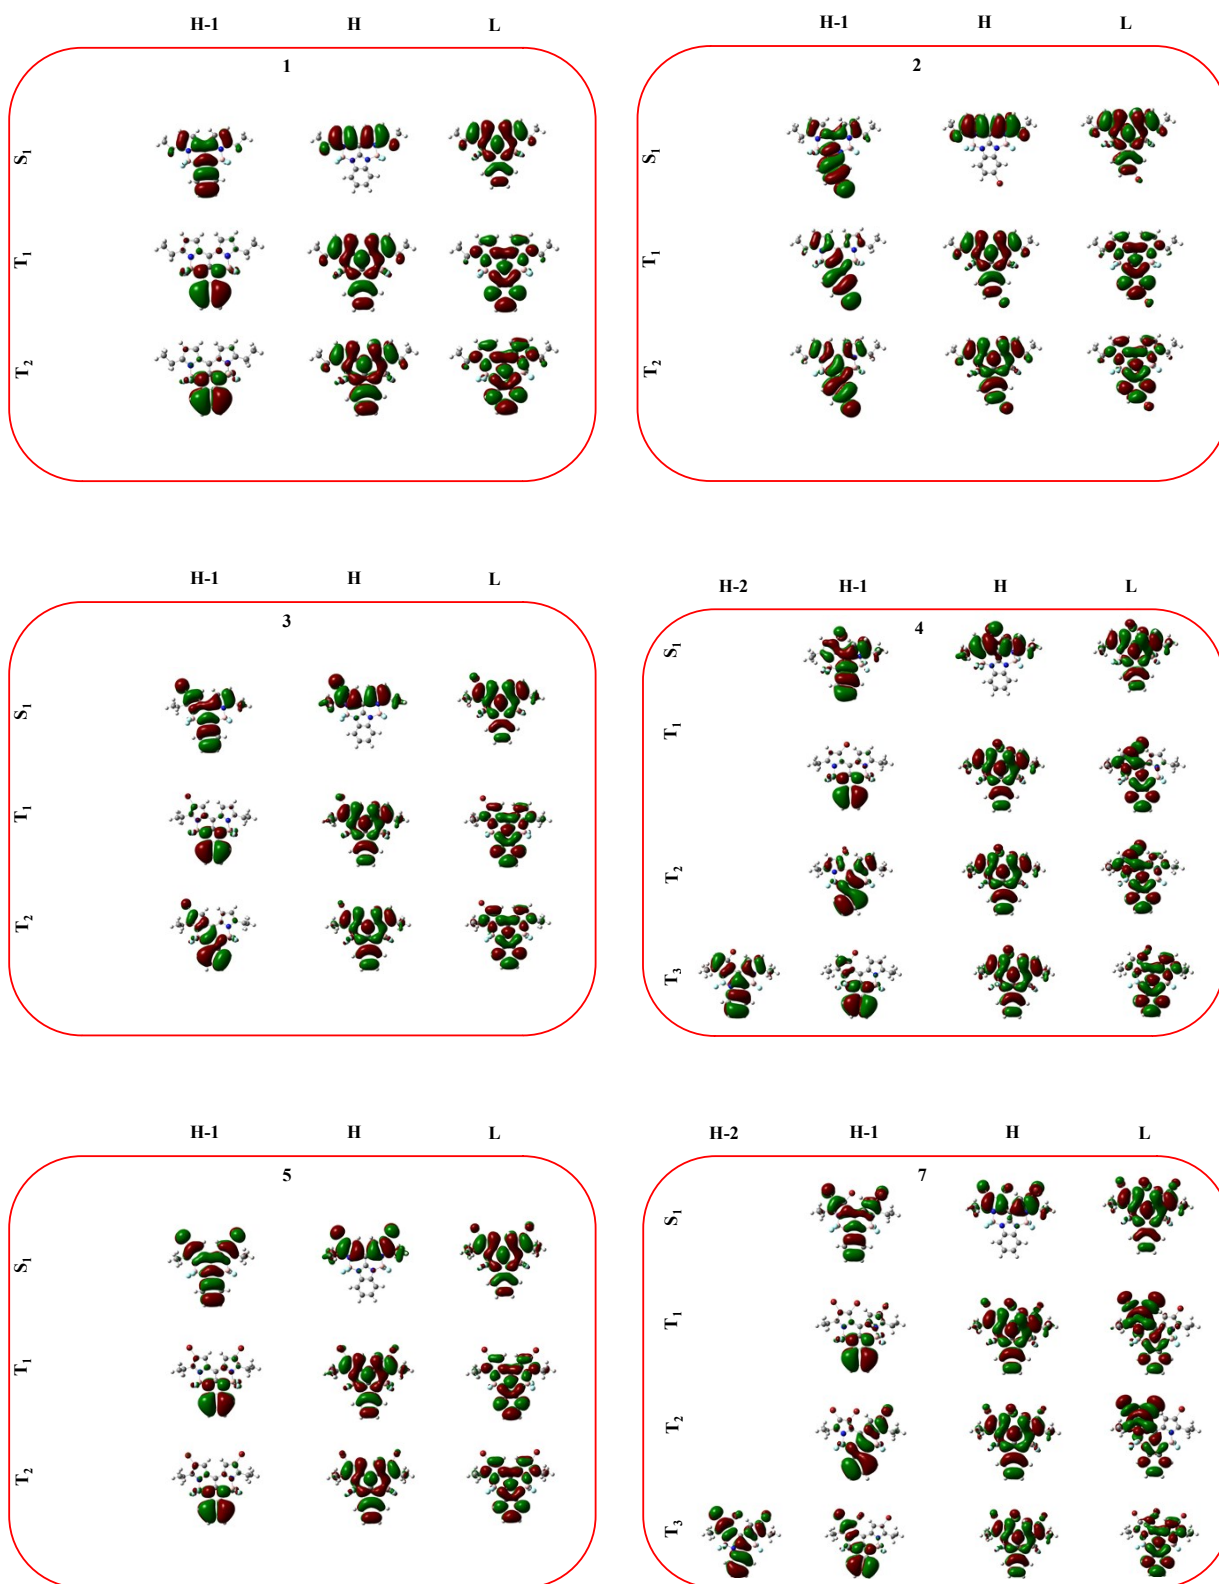

Supplement: c7cp06763a1.pdf [file c7cp06763a1.pdf]
